# Supplementary material for: Solution structure and stability of a disulfide cross-linked nucleopeptide duplex
Source: Royal Society of Chemistry journal article supplement (doi:10.1039/b307300a), 2003-01-01
Supplement: b307300a.pdf [file b307300a.pdf]

**Figure S1.** Imino region of the NOESY spectra of [Ac-Cys-Gly-Ala-Hse(p<sup>3'</sup>dGCATGC)-Ala-OH]<sub>2</sub>[S-S] in H<sub>2</sub>O (100mM NaCl, T=5°C, pH=7, τ<sub>m</sub>= 200 ms).

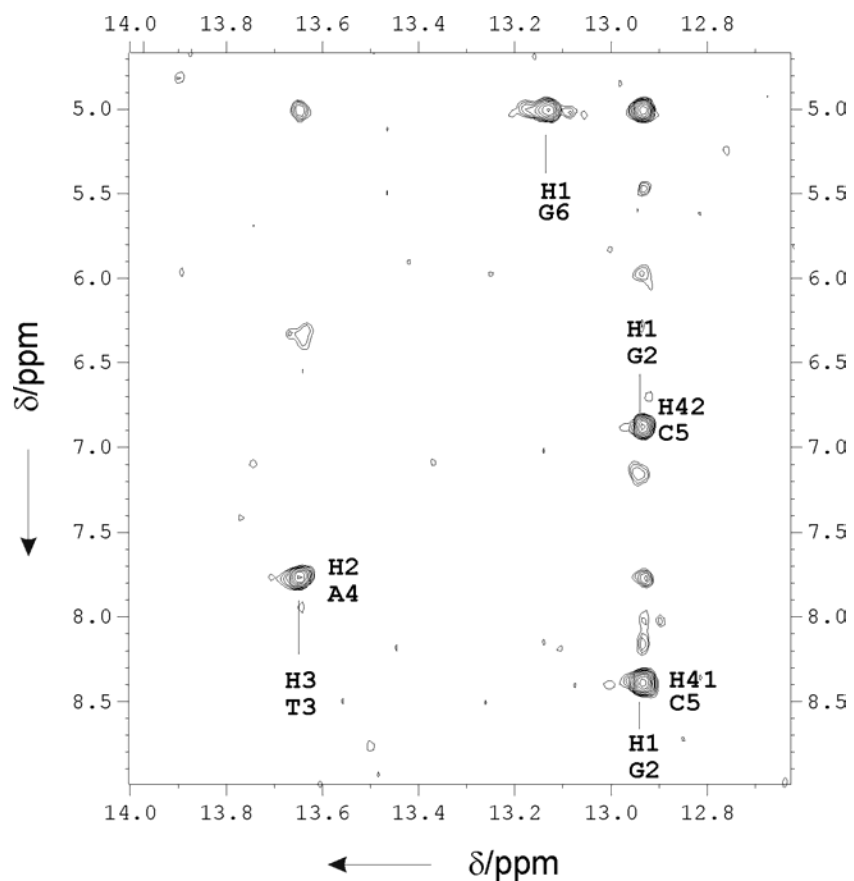

**Figure S2.** NMR and UV melting curves of [Ac-Cys-Gly-Ala-Hse(p<sup>3'</sup>dGCATGC)-Ala-OH]<sub>2</sub>[S-S]. Top: Chemical shift variation versus temperature for H5C2 and H2A3. Middle: Chemical shift variation of the thymine methyl resonance. Nucleopeptide concentrations are 1 mM (solid lines), and 0.1 mM (dashed lines). Bottom: UV melting curve at 2 μM nucleopeptide concentration.

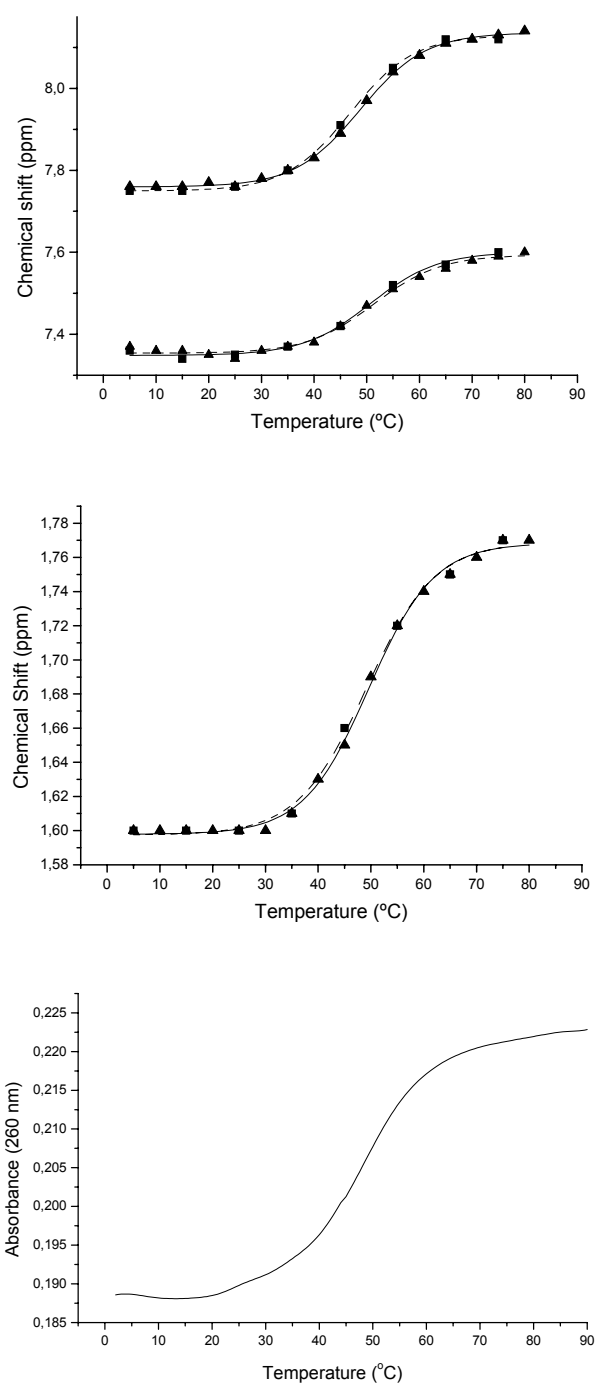

**Table S1.**  $^1\text{H-NMR}$  assignments of [Ac-Cys-Gly-Ala-Hse( $p^3$ dCGATCG)-Ala]-  
 [ $p^3$ dCGATGC] (100mM NaCl, T=5°C, pH=7).

| Res.               | H4'  | H1'       | H6/H8     | H2'  | H2'' | H3'  | H5'  | H2/H5/M  | NH <sub>2</sub> (2) | NH <sub>2</sub> (1) | NH    |
|--------------------|------|-----------|-----------|------|------|------|------|----------|---------------------|---------------------|-------|
| 1CYT               | 4.08 | 5.76      | 7.68      | 2.06 | 2.46 | 4.74 | 3.73 | 5.945    | 8.17                | 7.16                |       |
| 2GUA               | 4.39 | 6.00      | 8.06      | 2.79 | 2.79 | 5.02 | 4.15 |          |                     |                     | 12.93 |
| 3THY               | 4.24 | 5.59      | 7.38      | 2.18 | 2.45 | 4.92 | 4.15 | 1.60     |                     |                     | 13.65 |
| 4ADE               | 4.47 | 6.32      | 8.40      | 2.80 | 2.93 | 5.08 | 4.14 | 7.76     |                     |                     |       |
| 5CYT               | 4.14 | 5.71      | 7.36      | 1.83 | 2.31 | 4.84 | 4.27 | 5.47     | 8.38                | 6.87                |       |
| 6GUA               | 4.38 | 6.23      | 7.99      | 2.74 | 2.56 | 4.97 |      |          |                     |                     | 13.17 |
|                    | HN   | HA        | HB2/3     |      |      |      |      |          |                     |                     |       |
| 13CYS <sup>†</sup> | 8.77 | 4.90      | 3.04/3.31 |      |      |      |      |          |                     |                     |       |
| 14GLY              | 8.96 | 4.07/3.97 |           |      |      |      |      |          |                     |                     |       |
| 15ALA              | 8.34 | 4.38      | 1.44      |      |      |      |      |          |                     |                     |       |
| 16HSE              | 8.63 | 4.48      | 2.08/2.29 |      |      |      |      | HG2 4.00 |                     |                     |       |
| 17ALA              | 8.09 | 4.08      | 1.36      |      |      |      |      |          |                     |                     |       |

<sup>†</sup>Acetyl terminal group = 1.82 ppm
